# Supplementary material
Source: PubMed Central journal article supplement (PMC3811420)
Supplement: AAC.01029-13_zac010132167so1.pdf [file AAC.01029-13_zac010132167so1.pdf]

**TABLE S1** Summary of the oligonucleotide primers used in this study\*

## A. Reverse Transcription-PCR Primers

| Position <sub>HXB2</sub> | Name         | Sequence             |
|--------------------------|--------------|----------------------|
| 2703→2722                | RT_Sense     | CCTGAAAATCCATACAATAC |
| 3786←3804                | RT_Antisense | TATTGACAAACTCCCCTC   |

## B. AS-PCR Primers

| Position <sub>HXB2</sub> | Name          | Sequence                       |
|--------------------------|---------------|--------------------------------|
| 2942→2960                | 138_Total     | CATACCTAGTATAAAACAAT           |
| 2942→2962                | 138A_GC       | CATACCTAGTATAAACT <b>TTGC</b>  |
|                          | 138G_GG       | CATACCTAGTATAAACT <b>TCTGG</b> |
|                          | 138K_AA       | CATACCTAGTATAAACT <b>GTAA</b>  |
|                          | 138Q_CA       | CATACCTAGTATAAACT <b>TCTCA</b> |
|                          | 138R_CG       | CATACCTAGTATAAACT <b>TCTAG</b> |
|                          | 138V_GT       | CATACCTAGTATAAACT <b>TCTGT</b> |
| 3212←3230                | 138_Antisense | GAATGGAGGTTCTTTCTGA            |

\*Sequences are provided 5' to 3'. Bolded nucleotides were intentionally mismatched; bolded and underlined nucleotides base-pair with the specified mutant codon.

McCallum, *et al* (2013) FIG S2

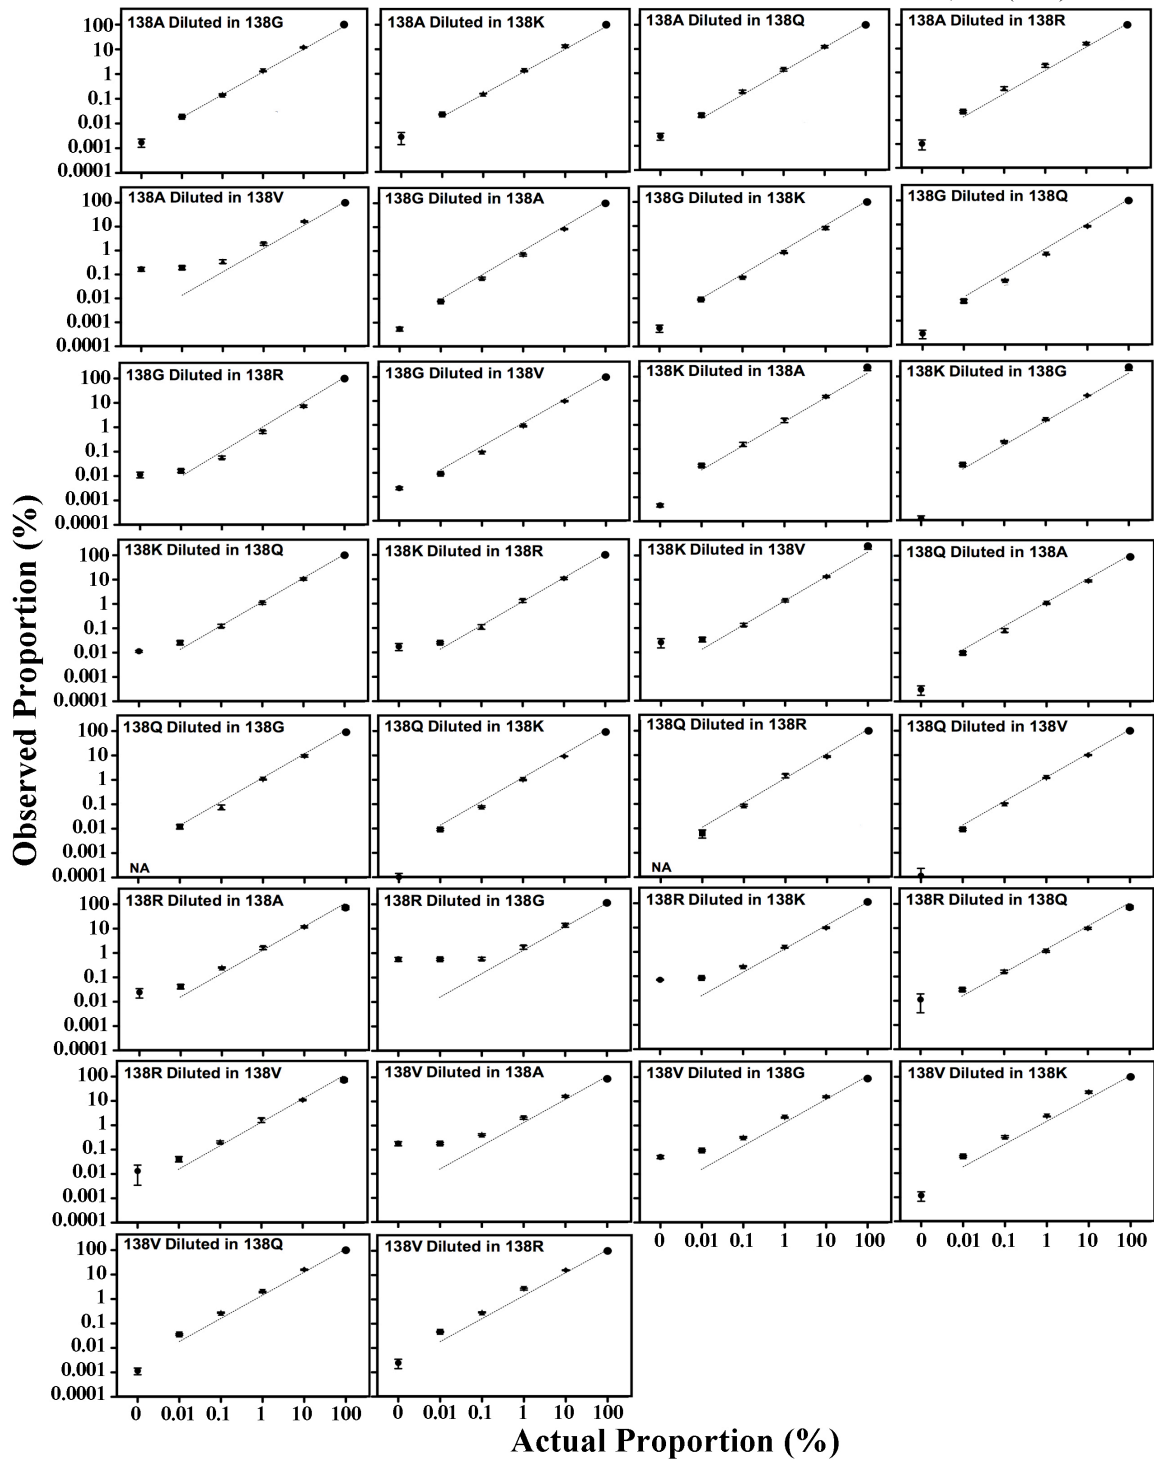

**FIG S2** E138 drug resistance substitutions serially diluted in other E138 drug resistance substitutions and measured by AS-PCR. DNA used for dilutions are PCR amplicons from pNL4-3 vector containing specified mutations. Data are representative of the mean±SEM of two independent trials performed in triplicate. (Dotted line) equivalence between actual and observed proportion. (NA) the PCR reaction with the allele-specific primer failed to amplify.

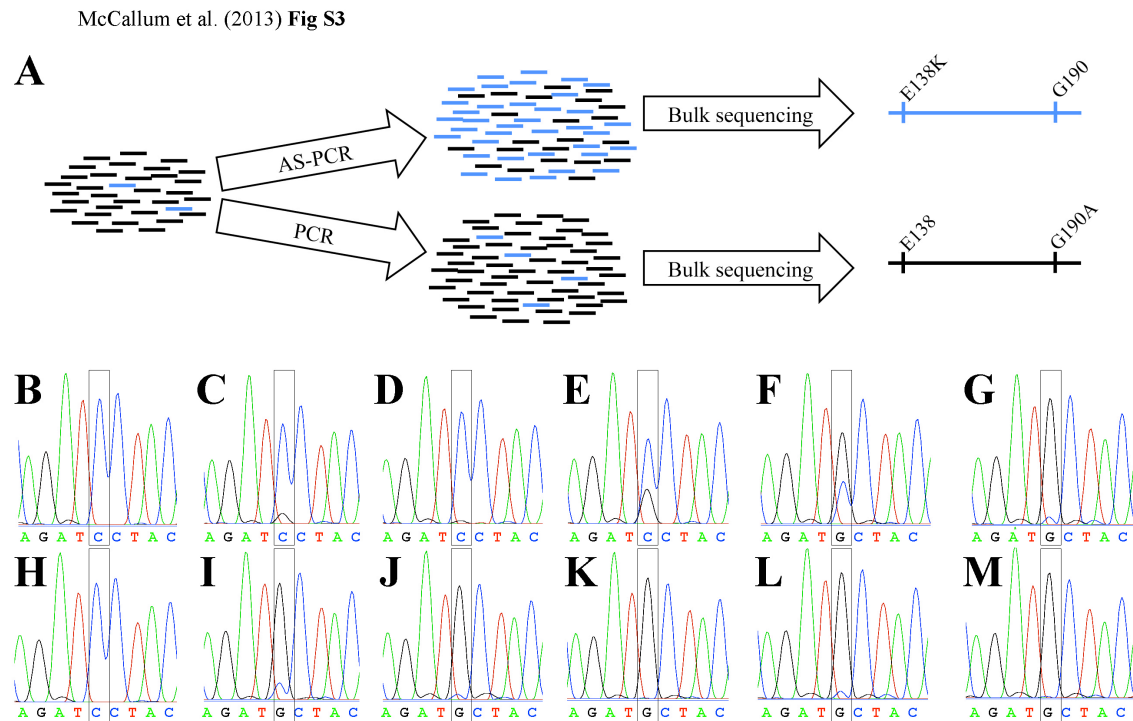

**FIG S3** Sequencing the amplicon of AS-PCR reactions with the antisense primer demonstrating that this method is not susceptible to RT-PCR recombination events. (A) Schematic representation of the method; horizontal bars represent HIV-1 DNA and genetically linked mutations. (B-M) Viruses containing G190 and the E138K substitution were serially diluted in viruses with E138 and the G190A substitution; after RT-PCR and AS-PCR, the PCR amplicon was sequenced with the 138\_Antisense primer. (B-G) AS-PCR was performed with the 138K\_AA AS-primer preceding sequencing. (H-M) AS-PCR was performed with the 138\_Total non-allele-specific primer preceding sequencing. The viral dilution series with E138K virus diluted in G190A virus was as follows: (B & H) 100% E138K; (C & I) 10% E138K; (D and J) 1% E138K; (E and K) 0.1% E138K; (F and L) 0.01% E138K, (G and M) 0% E138K. Note that the G190 anticodon is TCC and the G190A anticodon is TGC.

**TABLE S4** Sequencing of the E138K AS-PCR from etravirine selection experiments

| Isolate | Passage | E138K Proportion (%) <sup>*</sup> | Not Allele-Specific       | E138K-Linked        |
|---------|---------|-----------------------------------|---------------------------|---------------------|
| 5326    | 8       | 1                                 | None                      | E138K               |
|         | 12      | 30                                | E138E/K, Y181Y/C, V189V/I | E138K, V189I        |
|         | 16      | 20                                | E138E/K, Y181C            | E138K, Y181C        |
|         | 25      | 100                               | E138K, V179D, Y181C       | E138K, V179D, Y181C |
| 5331    | 5       | 0.1                               | None                      | E138K               |
|         | 8       | 0.9                               | None                      | E138K               |
|         | 12      | 20                                | E138E/K, V189V/I          | E138K, V189V/I      |
|         | 16      | 40                                | E138K/E, V189I/V          | E138K, V189I/V      |
|         | 25      | 100                               | E138K, V189I              | E138K, V189I        |
| 8116    | 12      | 1                                 | G190A                     | E138K, G190A        |
|         | 16      | 14                                | G190A                     | E138K, G190A        |
|         | 25      | 100                               | E138Q/K, G190A            | E138K, G190A        |
| 8336    | 5       | 3                                 | G190A                     | G190A               |
|         | 8       | 30                                | E138E/K, G190A            | E138K, G190A        |
|         | 12      | 100                               | E138K, G190A              | E138K, G190A        |
|         | 16      | 80                                | E138K, G190A              | E138K, G190A        |
|         | 25      | 100                               | E138K, G190A              | E138K, G190A        |
| BG-05   | 5       | 0.2                               | None                      | E138K               |
|         | 8       | 8                                 | None                      | E138K               |
|         | 12      | 80                                | E138K/E, Y181Y/C          | E138K               |
|         | 16      | 30                                | E138E/K, Y181C            | E138K, Y181C        |
|         | 24      | 100                               | E138K, Y181C              | E138K, Y181C        |

<sup>\*</sup>Proportion corrected based on fold decrease in observed proportion due to primer mismatches

**TABLE S5** Mutations specifically enriched with E138K by sequencing of allele-specific PCR amplicon from six drug-naïve plasma samples testing positive for E138K

| Subtype<br>(Patient) | Measured<br>Proportion of<br>E138K (%) | Nucleotide Mutations*    |       |                  | Corresponding<br>E138K-Linked<br>Substitutions |
|----------------------|----------------------------------------|--------------------------|-------|------------------|------------------------------------------------|
|                      |                                        | Position <sub>HXB2</sub> | Total | E138K-<br>Linked |                                                |
| B(4)                 | 0.4                                    | 2972                     | G/A   | G                | Silent                                         |
|                      |                                        | 2993                     | G     | G/A              | Silent                                         |
|                      |                                        | 3050                     | C     | C/T              | Silent                                         |
|                      |                                        | 3125                     | C     | C/T              | Silent                                         |
| B(15)                | 0.1                                    | 2972                     | G/A   | A                | Silent                                         |
| B(18)                | 0.08                                   | 3026                     | A/C   | A                | Silent                                         |
|                      |                                        | 3046                     | A/G   | A                | K/R166K                                        |
|                      |                                        | 3118                     | G/C   | G                | G/A190G                                        |
|                      |                                        | 3161                     | G/A   | A                | Silent                                         |
| B(21)                | 0.09                                   | 3002                     | G/A   | A                | Silent                                         |
| B(22)                | 0.1                                    | 3035                     | C/T   | C                | Silent                                         |
| C(1)                 | 0.2                                    | 3041                     | G →   | A                | M164I                                          |
|                      |                                        | 3065                     | G →   | A                | Silent                                         |
|                      |                                        | 3098                     | T/C   | C                | Silent                                         |
|                      |                                        | 3102                     | G →   | A                | D185N                                          |
|                      |                                        | 3105                     | G →   | A                | D186N                                          |
|                      |                                        | 3110                     | G →   | A                | Silent                                         |
|                      |                                        | 3118                     | G →   | A                | G190E                                          |
|                      |                                        | 3123                     | G →   | A                | D192N                                          |
|                      |                                        | 3129                     | G →   | A                | E194K                                          |
|                      |                                        | 3135                     | G →   | A                | G196K                                          |
|                      |                                        | 3136                     | G →   | A                | G196K                                          |
|                      |                                        | 3159                     | G →   | A                | E204K                                          |
|                      |                                        | 3166                     | G →   | A                | R206K                                          |
|                      |                                        | 3168                     | G →   | A                | E207K                                          |

\*Only mutations between position 2963 to ~3160—the region amplified during AS-PCR—were screened. All mutations linked to E138K are not reported; simply the mutations that were different between amplicons produced with non-allele specific primer 138\_Total and the AS-primer E138K\_AA have been reported. A slash indicates that the mutation is in a mixture with the species on the left of the slash in greater proportion than that on the right. Also, arrows highlight G→A mutations.
